# Supplementary material for: Validation of the Global Environmental Multiscale Model (GEM) for Iran
Source: Research Square preprint supplement (doi:10.21203/rs.3.rs-216566/v1), 2021-06-09
Supplement: Supplementary file 1 [file 0cf11688481e0a399e2062f5.docx]

Table C.The decomposition of daily precipitation KGE criterion to components , , r for regions of Iran.

| Zones |  |  | r | KGE |
| --- | --- | --- | --- | --- |
| Arid | 1.02 | 1.68 | 0.6 | 0.23 |
| Semi-Arid | 1.24 | 1.21 | 0.41 | 0.33 |
| Humid | 1.49 | 1.09 | 0.35 | 0.15 |
