# Supplementary material for: Validation of the Global Environmental Multiscale Model (GEM) for Iran
Source: Research Square preprint supplement (doi:10.21203/rs.3.rs-216566/v1), 2021-06-09
Supplement: Supplementary file 2 [file d819e81b96bb67c3209b25e7.docx]

Table A. a summary of the meteorological stations and study regions

| Zones | Mean elevation of zones (m) | Mean elevation of stations (m) | Number of synoptic stations | Stations density (10000/km2 ) | Date cooperated with GEM | Missing Data |
| --- | --- | --- | --- | --- | --- | --- |
| Arid | 1153 | 1075.7 | 87 | 0.78 | 4 years | NO |
| Semi-Arid | 1377 | 1088.86 | 63 | 1.2 | 4 years | NO |
| Humid | 1119 | 1122.53 | 27 | 2 | 4 years | NO |
| country | 1305 | 1097.53 | 177 | 1.07 | 4 years | NO |
